# Supplementary material for: Defining the Habitome: Phenotypes of Routine and Their Relationship to Health Outcomes
Source: Research Square preprint supplement (doi:10.21203/rs.3.rs-5861743/v2), 2025-04-17

# Extended Data

**Extended Data Table 1.** Summary of device ownership among cohort participants who provided their device information (n = 12,898). Note: Participants were allowed to report more than one device.

| Fitbit Model         | Type              | Count |
|----------------------|-------------------|-------|
| Charge 5             | Wristband (2021)  | 2372  |
| Charge 2             | Wristband (2016)  | 2193  |
| Versa 2              | Smartwatch (2019) | 1799  |
| Charge 4             | Wristband (2020)  | 1353  |
| Sense                | Smartwatch (2020) | 1345  |
| Charge 3             | Wristband (2018)  | 1034  |
| Versa 3              | Smartwatch (2020) | 912   |
| Versa 4              | Smartwatch (2022) | 911   |
| Versa                | Smartwatch (2018) | 857   |
| Alta HR              | Wristband (2017)  | 839   |
| Inspire 2            | Wristband (2020)  | 818   |
| Luxe                 | Wristband (2021)  | 592   |
| Inspire HR           | Wristband (2019)  | 557   |
| Blaze                | Smartwatch (2016) | 445   |
| Sense 2              | Smartwatch (2022) | 393   |
| Versa Lite           | Smartwatch (2019) | 346   |
| Charge HR            | Wristband (2015)  | 274   |
| Inspire 3            | Wristband (2022)  | 254   |
| Google Pixel Watch   | Smartwatch (2022) | 180   |
| Ionic                | Smartwatch (2017) | 168   |
| Alta                 | Wristband (2016)  | 102   |
| One                  | Clip (2012)       | 100   |
| Surge                | Smartwatch (2014) | 87    |
| Flex                 | Wristband (2013)  | 80    |
| Flex 2               | Wristband (2016)  | 75    |
| Inspire              | Wristband (2019)  | 71    |
| Zip                  | Clip (2012)       | 56    |
| Charge               | Wristband (2014)  | 43    |
| Ace 2                | Wristband (2019)  | <20   |
| Force                | Wristband (2013)  | <20   |
| Ultra                | Clip (2011)       | <20   |
| Classic              | Clip (2009)       | <20   |
| Google Pixel Watch 2 | Smartwatch (2023) | <20   |
| Ace 3                | Wristband (2021)  | <20   |

6 **Extended Data Table 2:** Demographics of each group of clusters from the intra-week patterns (columns  
7 in Figure 3B).

|                           |                           | Non-habitual<br>low wear | Non-habitual<br>high wear | Daytime<br>Wear | Nighttime<br>Wear | Morning<br>Gap | Night<br>Gap  | Other<br>(Membership<br>< 20) |
|---------------------------|---------------------------|--------------------------|---------------------------|-----------------|-------------------|----------------|---------------|-------------------------------|
| <b>Total N</b>            |                           | 7,490                    | 5,358                     | 2,047           | 74                | 263            | 126           | 31                            |
| <b>Number of<br/>days</b> | Mean days/person          | 532 ± 319                | 1348 ± 345                | 1038 ±<br>406   | 1246 ±<br>445     | 1300 ±<br>384  | 1395 ±<br>326 | 1053 ± 311                    |
|                           |                           |                          |                           |                 |                   |                |               |                               |
| <b>Age</b>                | 14-29                     | 1173                     | 546                       | 162             | <20               | 23             | <20           | <20                           |
|                           | 30-39                     | 1415                     | 944                       | 340             | <20               | 45             | <20           | <20                           |
|                           | 40-49                     | 1232                     | 895                       | 359             | <20               | 50             | 28            | <20                           |
|                           | 50-64                     | 2253                     | 1770                      | 727             | <20               | 86             | 44            | <20                           |
|                           | 65+                       | 1380                     | 1203                      | 435             | 27                | 59             | 34            | <20                           |
| <b>Sex at birth</b>       | Female                    | 5507                     | 3618                      | 1512            | 35                | 166            | 65            | <20                           |
|                           | Male                      | 1959                     | 1711                      | 520-530         | 39                | 97             | 61            | <20                           |
|                           | Other/Unknown             | 24                       | 29                        | <20             | 0                 | 0              | 0             | <20                           |
| <b>Race</b>               | Asian                     | 238                      | 172                       | 66              | <20               | <20            | <20           | <20                           |
|                           | Black or African American | 446                      | 218                       | 180             | <20               | <20            | <20           | <20                           |
|                           | White                     | 5888                     | 4525                      | 1591            | 61                | 211            | 99            | 25                            |
|                           | Other                     | 481                      | 263                       | 94              | <20               | <20            | <20           | <20                           |
|                           | Unknown                   | 437                      | 180                       | 116             | <20               | <20            | <20           | <20                           |
| <b>Ethnicity</b>          | Not Hispanic or Latino    | 6744                     | 4995                      | 1871            | 67                | 243            | 116           | <20                           |
|                           | Hispanic or Latino        | 625                      | 297                       | 153             | <20               | <20            | <20           | 20-30                         |
|                           | Unknown/Other             | 121                      | 66                        | 23              | <20               | <20            | <20           | 0                             |
| <b>Income</b>             | <50k                      | 1846                     | 898                       | 320             | <20               | 35             | <20           | <20                           |
|                           | 50-75k                    | 1234                     | 737                       | 325             | <20               | 39             | 22            | <20                           |
|                           | 75k-100k                  | 1097                     | 847                       | 337             | <20               | 50             | 30            | <20                           |
|                           | 100-150k                  | 1447                     | 1225                      | 457             | <20               | 63             | <20           | <20                           |
|                           | 150-200k                  | 661                      | 618                       | 223             | <20               | 27             | <20           | <20                           |
|                           | >200k                     | 770                      | 765                       | 266             | <20               | 30-35          | <20           | <20                           |
|                           | Unknown                   | 435                      | 268                       | 119             | <20               | <20            | <20           | <20                           |

**Extended Data Table 3.** Chosen clinical outcomes based on the BRFSS, their corresponding question from BRFSS, and the list of Observational Medical Outcomes Partnership (OMOP) concept IDs used to define each clinical outcome.

| Clinical Outcome                             | BRFSS Question                                                                                                                                                                                                                                                                                                            | OMOP                                                                                                                                                                                                                                                                                                                                                                                                                                                                                                            |
|----------------------------------------------|---------------------------------------------------------------------------------------------------------------------------------------------------------------------------------------------------------------------------------------------------------------------------------------------------------------------------|-----------------------------------------------------------------------------------------------------------------------------------------------------------------------------------------------------------------------------------------------------------------------------------------------------------------------------------------------------------------------------------------------------------------------------------------------------------------------------------------------------------------|
| Heart attack                                 | (Ever told) (you had) heart attack, also called a myocardial infarction?                                                                                                                                                                                                                                                  | 4329847                                                                                                                                                                                                                                                                                                                                                                                                                                                                                                         |
| Angina                                       | (Ever told) (you had) angina or coronary heart disease?                                                                                                                                                                                                                                                                   | 317576, 321318, 36712983                                                                                                                                                                                                                                                                                                                                                                                                                                                                                        |
| Stroke                                       | (Ever told) (you had) a stroke.                                                                                                                                                                                                                                                                                           | 197303, 36684840, 37395574, 37395575, 381316, 4045734, 40479572, 40480946, 40481354, 40481389, 40482266, 40482301, 40484101, 40484910, 4090122, 4110196, 4112022, 4116269, 42535112, 42535113, 42535114, 42535416, 42535417, 42535419, 42535459, 42535460, 42535461, 42535511, 42535512, 42539166, 42539195, 42539262, 43530623, 43530742, 43531610, 443465, 443525, 443551, 44782753, 44782781, 761785, 761789, 761790, 761792, 761793, 761794, 761795, 761796, 761797, 761798, 762340, 762344, 764721, 765568 |
| Asthma                                       | (Ever told) (you had) asthma?                                                                                                                                                                                                                                                                                             | 317009                                                                                                                                                                                                                                                                                                                                                                                                                                                                                                          |
| Skin cancer, not melanoma                    | (Ever told) (you had) skin cancer that is not melanoma?                                                                                                                                                                                                                                                                   | 138102, 435506                                                                                                                                                                                                                                                                                                                                                                                                                                                                                                  |
| Cancer                                       | (Ever told) (you had) melanoma or any other types of cancer?                                                                                                                                                                                                                                                              | 443392                                                                                                                                                                                                                                                                                                                                                                                                                                                                                                          |
| Chronic obstructive pulmonary disease (COPD) | (Ever told) (you had) C.O.P.D. (chronic obstructive pulmonary disease), emphysema or chronic bronchitis?                                                                                                                                                                                                                  | 255573, 255841, 261325                                                                                                                                                                                                                                                                                                                                                                                                                                                                                          |
| Depressive disorder                          | (Ever told) (you had) a depressive disorder (including depression, major depression, dysthymia, or minor depression)?                                                                                                                                                                                                     | 433440, 440383                                                                                                                                                                                                                                                                                                                                                                                                                                                                                                  |
| Kidney disease                               | Not including kidney stones, bladder infection or incontinence, were you ever told you had kidney disease?                                                                                                                                                                                                                | 198124                                                                                                                                                                                                                                                                                                                                                                                                                                                                                                          |
| Arthritis                                    | (Ever told) (you had) some form of arthritis, rheumatoid arthritis, gout, lupus, or fibromyalgia? (Arthritis diagnoses include: rheumatism, polymyalgia rheumatica; osteoarthritis (not osteoporosis); tendonitis, bursitis, bunion, tennis elbow; carpal tunnel syndrome, tarsal tunnel syndrome; joint infection, etc.) | 134453, 138845, 192885, 255348, 255891, 257628, 380094, 40405599, 4147145, 4180167, 42535223, 42535408, 42535409, 4291025, 4316217, 4344158, 440674, 443744, 760925, 762150, 762151, 80180, 80809, 81379                                                                                                                                                                                                                                                                                                        |
| Type 2 diabetes mellitus                     | (Ever told) (you had) diabetes? (If 'Yes' and respondent is female, ask 'Was this only when you were <u>pregnant</u> ?'. If Respondent says pre-diabetes or borderline diabetes, use response code 4.)                                                                                                                    | 201826                                                                                                                                                                                                                                                                                                                                                                                                                                                                                                          |

**Extended Data Table 4.** Logistic regression and chi-square test results for associations between wear behavior and clinical outcomes. When level of wear was analyzed as a continuous variable, odds ratios from logistic regression are reported with their 95% confidence intervals in brackets. For categorical analyses, chi-square test statistics ( $\chi^2$ ), degrees of freedom (df), and p-values are provided. Significant results are highlighted in bold. The notation “S” indicates cases where Monte Carlo simulations were used to estimate p-values when applicable. COPD = Chronic Obstructive Pulmonary Disease, T2D = Type 2 Diabetes Mellitus.

| Clinical outcomes          | Level of Wear            |                   | Non-habitual vs. Habitual |                   |          | Non-habitual             |                   | Habitual          |         |               |               |          |                  |               |          |  |
|----------------------------|--------------------------|-------------------|---------------------------|-------------------|----------|--------------------------|-------------------|-------------------|---------|---------------|---------------|----------|------------------|---------------|----------|--|
|                            |                          |                   |                           |                   |          | Level of Wear            |                   | Level of Wear     |         | Wear Patterns |               |          | Wear Subpatterns |               |          |  |
|                            | Odds ratio               | p-value           | $\chi^2$                  | p-value           | DoF      | Odds ratio               | p-value           | Odds ratio        | p-value | $\chi^2$      | p-value       | DoF      | $\chi^2$         | p-value       | DoF      |  |
| Angina                     | 0.97 [0.90, 1.05]        | 0.4422            | 0.47                      | 0.4950            | 1        | 0.95 [0.87, 1.03]        | 0.2157            | 1.12 [0.93, 1.35] | 0.2189  | 1.89          | 0.5947        | 3        | 9.48             | 0.7360        | S        |  |
| Arthritis                  | 1.03 [0.98, 1.07]        | 0.2442            | 0.37                      | 0.5446            | 1        | 1.02 [0.97, 1.07]        | 0.4175            | 1.08 [0.98, 1.20] | 0.1380  | 1.76          | 0.6248        | 3        | 17.31            | 0.1853        | 13       |  |
| Asthma                     | <b>0.91 [0.86, 0.97]</b> | <b>0.0019</b>     | 0.20                      | 0.6540            | 1        | <b>0.91 [0.86, 0.97]</b> | <b>0.0048</b>     | 0.90 [0.78, 1.03] | 0.1299  | 0.55          | 0.9077        | 3        | 14.37            | 0.3453        | S        |  |
| Cancer                     | <b>1.10 [1.04, 1.16]</b> | <b>0.0018</b>     | 0.12                      | 0.7270            | 1        | <b>1.10 [1.03, 1.17]</b> | <b>0.0046</b>     | 1.12 [0.97, 1.29] | 0.1386  | 3.57          | 0.3120        | 3        | 19.91            | 0.0961        | S        |  |
| COPD                       | 0.94 [0.84, 1.05]        | 0.2989            | 0.81                      | 0.3671            | 1        | 0.94 [0.84, 1.07]        | 0.3479            | 0.96 [0.72, 1.29] | 0.7849  | 4.59          | 0.2024        | S        | 16.48            | 0.2213        | S        |  |
| Depression                 | <b>0.83 [0.79, 0.87]</b> | <b>&lt;0.0001</b> | <b>15.84</b>              | <b>&lt;0.0001</b> | <b>1</b> | <b>0.83 [0.79, 0.88]</b> | <b>&lt;0.0001</b> | 0.90 [0.79, 1.03] | 0.1227  | 0.39          | 0.9413        | 3        | <b>33.74</b>     | <b>0.0026</b> | <b>S</b> |  |
| Heart attack               | 0.93 [0.81, 1.08]        | 0.3543            | 0.04                      | 0.8377            | 1        | 0.91 [0.77, 1.07]        | 0.2356            | 1.16 [0.81, 1.67] | 0.4112  | <b>12.54</b>  | <b>0.0122</b> | <b>S</b> | <b>28.79</b>     | <b>0.0288</b> | <b>S</b> |  |
| Kidney disease             | 0.95 [0.89, 1.01]        | 0.0776            | 0.01                      | 0.9229            | 1        | <b>0.92 [0.86, 0.99]</b> | <b>0.0263</b>     | 1.11 [0.95, 1.29] | 0.1994  | 1.89          | 0.5955        | 3        | 19.61            | 0.1014        | S        |  |
| Skin cancer (not melanoma) | 1.03 [0.99, 1.07]        | 0.2091            | <b>5.27</b>               | <b>0.0217</b>     | <b>1</b> | 1.02 [0.97, 1.06]        | 0.4964            | 1.09 [0.98, 1.20] | 0.1073  | 1.48          | 0.6877        | 3        | 10.62            | 0.6428        | 13       |  |
| Stroke                     | 0.91 [0.67, 1.22]        | 0.5212            | 0.24                      | 0.6257            | 1        | 0.93 [0.66, 1.30]        | 0.6607            | 0.74 [0.37, 1.49] | 0.3977  | 5.18          | 0.1566        | S        | 13.18            | 0.3734        | S        |  |
| T2D                        | <b>0.93 [0.87, 1.00]</b> | <b>0.0471</b>     | 0.04                      | 0.8425            | 1        | <b>0.92 [0.86, 1.00]</b> | <b>0.0391</b>     | 1.00 [0.93, 1.35] | 0.9892  | 4.40          | 0.2217        | 2        | 15.91            | 0.2400        | S        |  |

**Extended Data Table 5.** Prevalence of clinical outcomes across wear behavior groups. This table presents the prevalence rates (%) of key clinical outcomes across wear behavior groups (e.g., inconsistent vs. consistent wear) and further subgroups (e.g., high vs. low wear levels and wear patterns such as Daytime Wear, Nighttime Wear, Morning Gap, and Night Gap). Weekday-weekend uniformity is described as the row number, counted from the bottom of Figure 3B, where 1 represents the pattern with the lowest difference between weekday and weekend wear patterns, and 5 represents the highest difference. We denote the combination of wear pattern and weekday-weekend uniformity as “abbreviated wear pattern” - “weekday-weekend uniformity.” For example, “D-1” denotes the Daytime Wear pattern with the lowest weekday-weekend uniformity. COPD = Chronic Obstructive Pulmonary Disease, T2D = Type 2 Diabetes Mellitus.

|                           | Non-habitual (N=7874) |                   |                    | Habitual (N=1566) |                       |             |             |             |            |                       |            |            |                  |             |             |             |                     |             |             |             |             |             |
|---------------------------|-----------------------|-------------------|--------------------|-------------------|-----------------------|-------------|-------------|-------------|------------|-----------------------|------------|------------|------------------|-------------|-------------|-------------|---------------------|-------------|-------------|-------------|-------------|-------------|
| Clinical Outcomes         |                       | Low Wear (N=4633) | High Wear (N=3241) |                   | Daytime Wear (N=1295) |             |             |             |            | Nighttime Wear (N=34) |            |            | Night Gap (N=71) |             |             |             | Morning Gap (N=166) |             |             |             |             |             |
|                           |                       |                   |                    |                   |                       | D-1 (N=282) | D-2 (N=482) | D-3 (N=468) | D-4 (N=63) |                       | N-1 (N=24) | N-2 (N=10) |                  | NG-1 (N=26) | NG-2 (N=32) | NG-3 (N=13) |                     | MG-1 (N=13) | MG-2 (N=70) | MG-3 (N=31) | MG-4 (N=24) | MG-5 (N=28) |
| Angina                    | 7.07                  | 7.6               | 7.07               | 7.6               | 7.18                  | 8.16        | 8.51        | 5.77        | 3.17       | 8.82                  | 8.33       | 10.00      | 9.86             | 7.69        | 12.5        | 7.69        | 9.64                | 15.38       | 10.00       | 12.9        | 8.33        | 3.57        |
| Arthritis                 | 37.5                  | 36.65             | 37.5               | 36.65             | 36.45                 | 40.78       | 39.42       | 30.98       | 34.92      | 47.06                 | 50.00      | 40.00      | 38.03            | 34.62       | 40.62       | 38.46       | 35.54               | 23.08       | 41.43       | 41.94       | 20.83       | 32.14       |
| Asthma                    | 14.72                 | 15.2              | 14.72              | 15.2              | 15.21                 | 17.02       | 12.24       | 17.31       | 14.29      | 17.65                 | 25.00      | 0.00       | 16.9             | 11.54       | 21.88       | 15.38       | 13.86               | 15.38       | 8.57        | 22.58       | 16.67       | 14.29       |
| Cancer                    | 13.72                 | 13.35             | 13.72              | 13.35             | 12.66                 | 14.54       | 13.28       | 11.32       | 9.52       | 20.59                 | 20.83      | 20.00      | 15.49            | 23.08       | 15.62       | 0.00        | 16.27               | 0.00        | 21.43       | 16.13       | 25.00       | 3.57        |
| COPD                      | 3.49                  | 3.00              | 3.49               | 3.00              | 2.70                  | 2.84        | 2.28        | 2.99        | 3.17       | 2.94                  | 4.17       | 0.00       | 7.04             | 11.54       | 6.25        | 0.00        | 3.61                | 7.69        | 1.43        | 9.68        | 0.00        | 3.57        |
| Depression                | 23.22                 | 18.58             | 23.22              | 18.58             | 18.61                 | 17.38       | 13.07       | 24.15       | 25.40      | 14.71                 | 16.67      | 10.00      | 18.31            | 26.92       | 12.5        | 15.38       | 19.28               | 15.38       | 20.00       | 35.48       | 4.17        | 14.29       |
| Heart attack              | 1.97                  | 1.85              | 1.97               | 1.85              | 1.31                  | 1.42        | 1.45        | 1.28        | 0.00       | 2.94                  | 4.17       | 0.00       | 4.23             | 0.00        | 9.38        | 0.00        | 4.82                | 7.69        | 7.14        | 3.23        | 0.00        | 3.57        |
| Kidney Disease            | 11.87                 | 11.75             | 11.87              | 11.75             | 11.27                 | 14.18       | 9.96        | 10.9        | 11.11      | 14.71                 | 20.83      | 0.00       | 15.49            | 3.85        | 25.00       | 15.38       | 13.25               | 0.00        | 12.86       | 22.58       | 8.33        | 14.29       |
| Skin cancer, not melanoma | 35.42                 | 38.51             | 35.42              | 38.51             | 38.92                 | 39.36       | 41.49       | 36.97       | 31.75      | 38.24                 | 45.83      | 20.00      | 40.85            | 46.15       | 40.62       | 30.77       | 34.34               | 38.46       | 38.57       | 38.71       | 25.00       | 25.00       |
| Stroke                    | 0.44                  | 0.57              | 0.44               | 0.57              | 0.54                  | 0.71        | 0.41        | 0.43        | 1.59       | 2.94                  | 4.17       | 0.00       | 1.41             | 3.85        | 0.00        | 0.00        | 0.00                | 0.00        | 0.00        | 0.00        | 0.00        | 0.00        |
| T2D                       | 9.72                  | 9.51              | 9.72               | 9.51              | 9.19                  | 10.28       | 7.26        | 10.47       | 9.52       | 14.71                 | 16.67      | 10.00      | 15.49            | 7.69        | 21.88       | 15.38       | 8.43                | 7.69        | 7.14        | 16.13       | 0.00        | 10.71       |

**Extended Data Table 6.** Results of Chi-Square tests examining the association between sub-patterns within each wear pattern (Daytime Wear, Nighttime Wear, Night Gap, and Morning Gap) and various clinical outcomes. Significant results after multiple testing corrections are bolded, and “S” denotes the use of Monte Carlo simulations to estimate p-values where applicable. COPD = Chronic Obstructive Pulmonary Disease, T2D = Type 2 Diabetes Mellitus.

| Clinical Outcomes         | Daytime wear |                   |          | Nighttime Wear |         |     | Night Gap |         |     | Morning Gap |         |     |
|---------------------------|--------------|-------------------|----------|----------------|---------|-----|-----------|---------|-----|-------------|---------|-----|
|                           | $\chi^2$     | p-value           | DoF      | $\chi^2$       | p-value | DoF | $\chi^2$  | p-value | DoF | $\chi^2$    | p-value | DoF |
| Angina                    | 4.59         | 0.2045            | 3        | 0.02           | 1.0000  | S   | 0.46      | 0.8689  | S   | 2.11        | 0.7382  | S   |
| Arthritis                 | 10.22        | 0.0168            | 3        | 0.28           | 0.7191  | S   | 0.22      | 0.8953  | 2   | 4.90        | 0.2976  | 4   |
| Asthma                    | 5.65         | 0.1299            | 3        | 3.04           | 0.1507  | S   | 1.12      | 0.6119  | S   | 3.80        | 0.4364  | S   |
| Cancer                    | 2.38         | 0.4971            | 3        | 0.00           | 1.0000  | S   | 3.53      | 0.1956  | S   | 8.55        | 0.0685  | S   |
| COPD                      | 0.55         | 0.9089            | 3        | 0.43           | 1.0000  | S   | 1.82      | 0.5025  | S   | 5.75        | 0.2140  | S   |
| Depression                | <b>21.43</b> | <b>&lt;0.0001</b> | <b>3</b> | 0.25           | 1.0000  | S   | 2.09      | 0.4011  | S   | 9.35        | 0.0529  | 4   |
| Heart attack              | 0.94         | 0.8758            | S        | 0.43           | 1.0000  | S   | 3.82      | 0.2166  | S   | 2.54        | 0.6503  | S   |
| Kidney Disease            | 3.29         | 0.3491            | 3        | 2.44           | 0.2936  | S   | 4.90      | 0.0849  | S   | 4.87        | 0.2944  | S   |
| Skin cancer, not melanoma | 3.48         | 0.3231            | 3        | 1.99           | 0.2630  | S   | 0.85      | 0.6537  | 2   | 2.93        | 0.5699  | 4   |
| Stroke                    | 1.69         | 0.6579            | S        | 0.43           | 1.0000  | S   | 1.76      | 0.5456  | S   | -           | -       | -   |
| T2D                       | 3.48         | 0.3234            | 3        | 0.25           | 1.0000  | S   | 2.20      | 0.3157  | S   | 4.94        | 0.2866  | S   |

**Extended Data Figure 1.** Inclusion criteria for main cohort and long-term cohort. The flow diagram describes the inclusion criteria applied to define the Main Cohort and the Long-Term Cohort used for visualization and clustering.

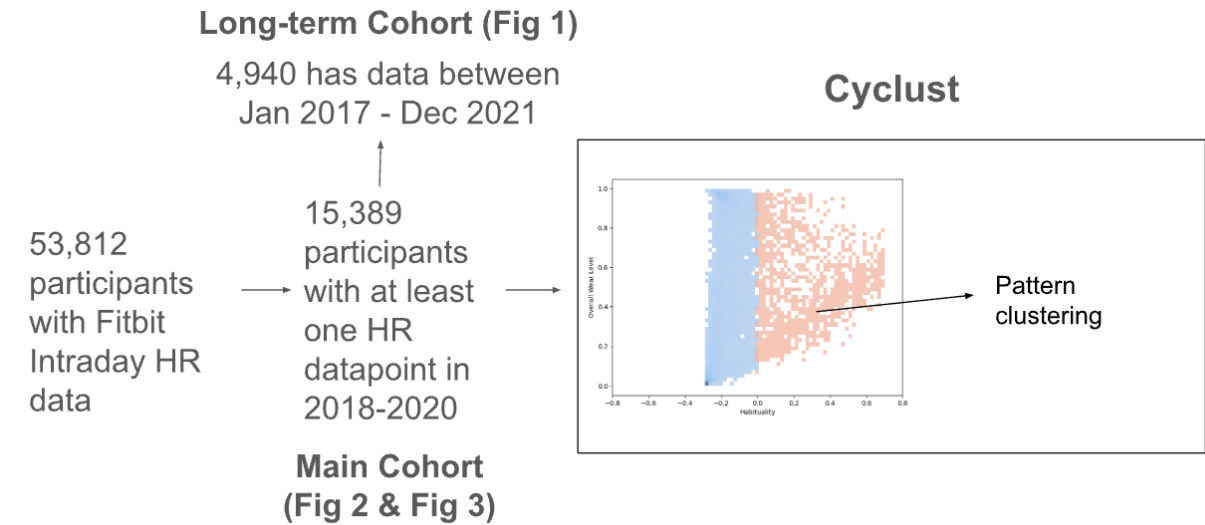

**Extended Data Figure 2:** Mean overall wear fraction of the long-term cohort (N=4,940) on federal holidays, and on the same day of the week in the 4 weeks preceding and following each holiday. Federal holidays included Martin Luther King Jr. Day, Presidents Day, Memorial Day, Independence Day, Labor Day, Columbus Day, Veterans Day, Thanksgiving, and Christmas. On each holiday, the population has a tendency to wear their devices less than on the same day of the week in the vicinity of the holiday. Only MLK Jr day has a different trend, but being in early January, this is attributable to the increase in wear at the beginning of every year.

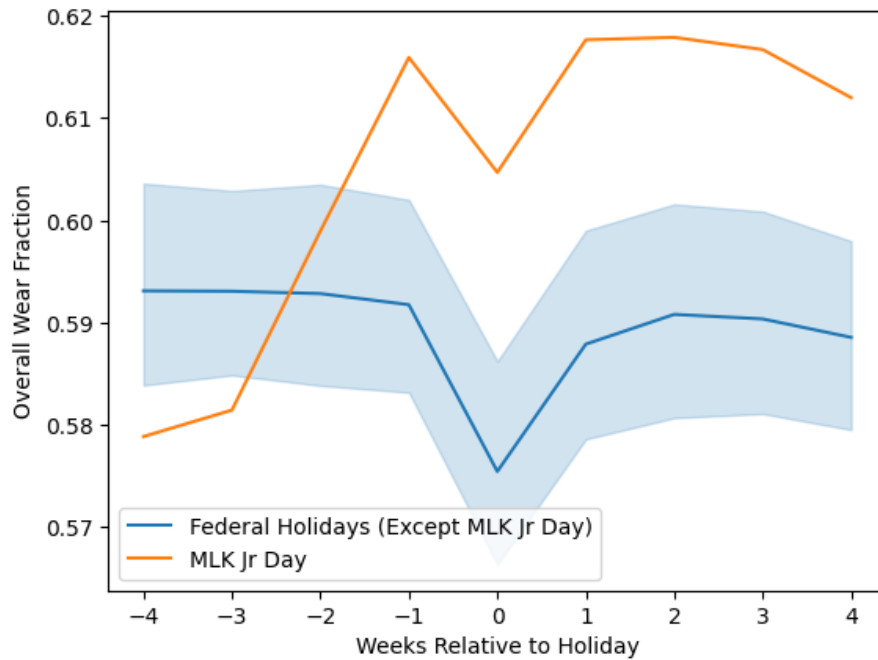



**Extended Data Figure 3:** Grouping similar patterns that were originally separated by the unsupervised agglomerative clustering algorithm. The final clusters presented in Figure 2B are a result of merging each of the boxed clusters together and recalculating the centroid. It should be noted that the non-habitual groups present in Figure 2B were excluded from this analysis.

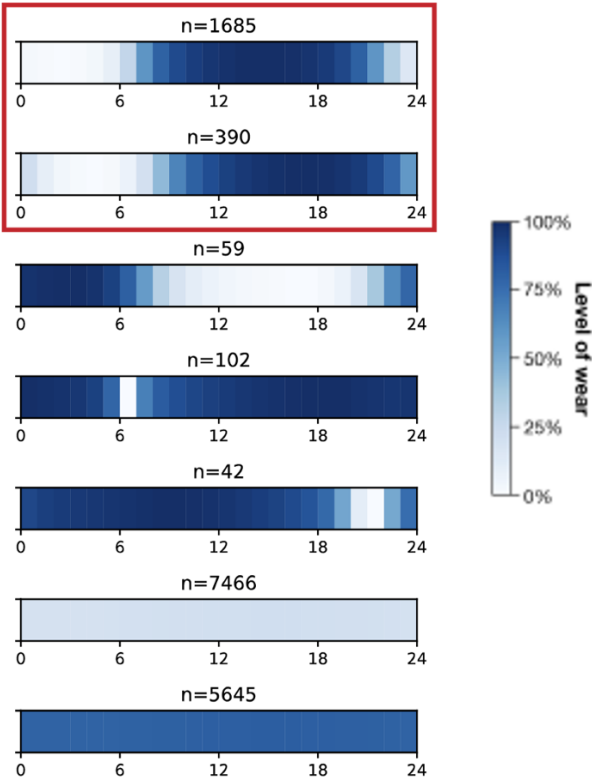

**Extended Data Figure 4:** Kernel density estimation (KDE) plot of overall wear levels stratified by demographic characteristics. The curves are normalized by subgroup. (A) Displays wear level distributions across male vs female. (B) Compares wear levels between younger (<50 years) and older (≥50 years) individuals. (C) Shows wear level distributions across all age groups. (D) Examines wear levels by annual income, aggregated into low-income (<\$75K) and high-income (≥\$75K) groups. (E) Displays wear level distributions across all detailed income brackets.

**A.**

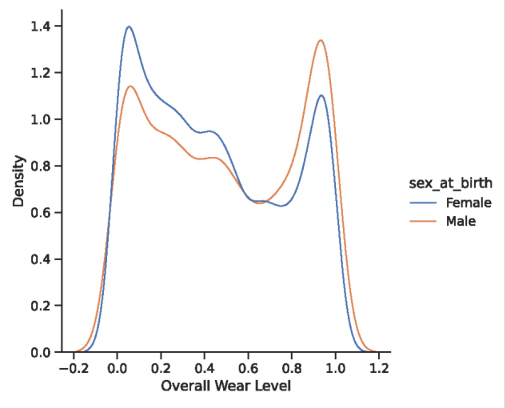

**B.**

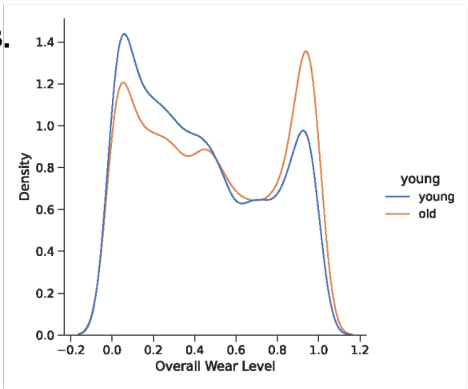

**C.**

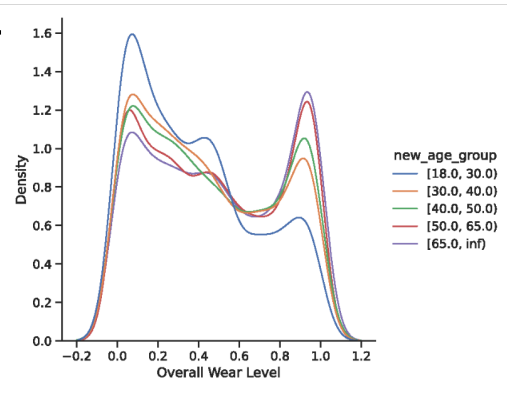

**D.**

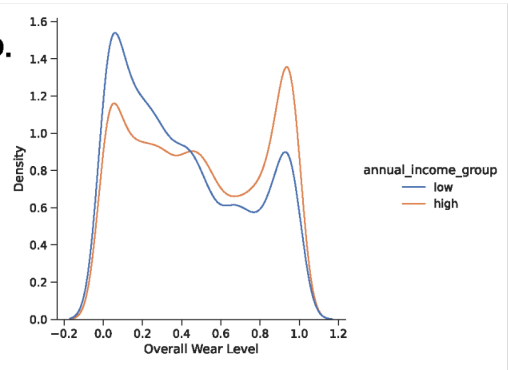

**E.**

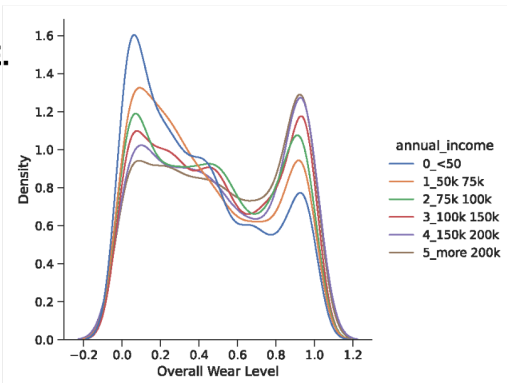

**Extended Data Figure 5:** Algorithm steps for extracting daily and weekly wear patterns. First, a binary indicator vector for whether the watch is worn is generated at a 15 minute resolution, then downsampled to hour-level fractional wear. Next the vector is reshaped into a matrix such that each day occupies one row in the matrix. For the daily wear pattern, this matrix is aggregated along the day axis to get the average wear level at each hour of the day, then normalized to mean 0 and standard deviation 1. For the weekly wear pattern, the matrix is further reshaped into a tensor which is a stack of matrices that each represent one week of days. The tensor is then aggregated along the week axis to get the average wear level at every given hour of the day on every day of the week.

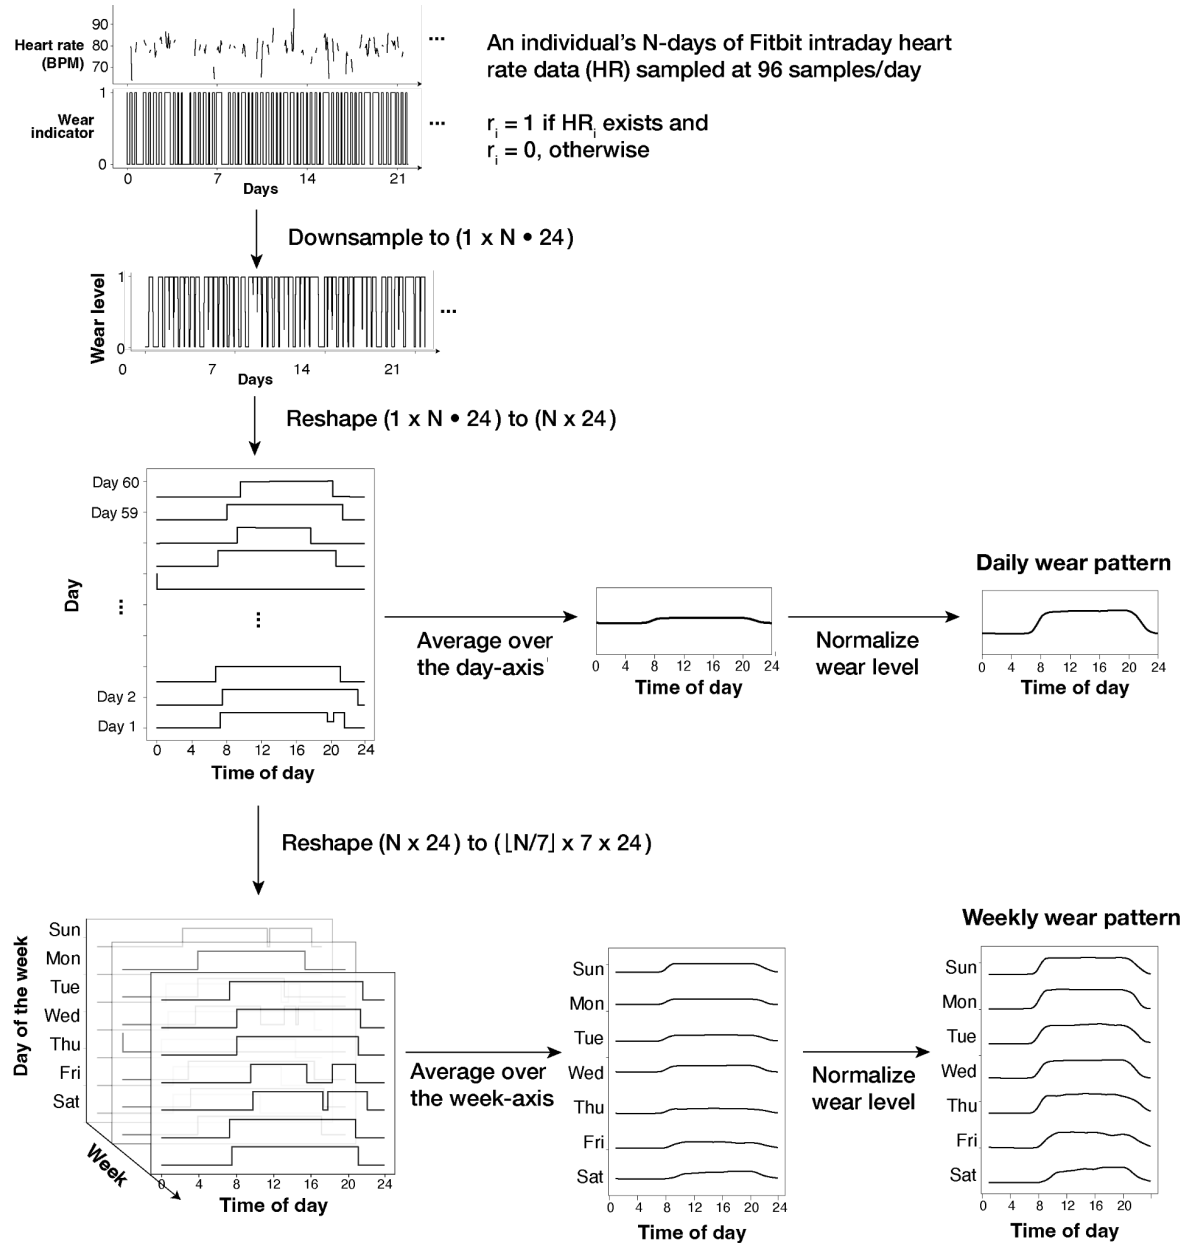

**Extended Data Figure 6. Weekday-weekend consistency.** The circadian and weekly consistency metrics are defined as the difference between the maximum and minimum values in an individual's intra-day or intra-week pattern vector (prior to normalization), respectively. Examples include: **(A)** an individual with high average wear level (more wear than non-wear days) but low consistency due to the differences in their timing and duration of wear; **(B)** an individual with low average wear levels (more non-wear than wear days) and low consistency; **(C)** an individual with high average wear levels and high consistency from wearing their device at consistent times; and **(D)** an individual with high weekly consistency from consistently wearing their device at similar times across all days of the week.

**A.**

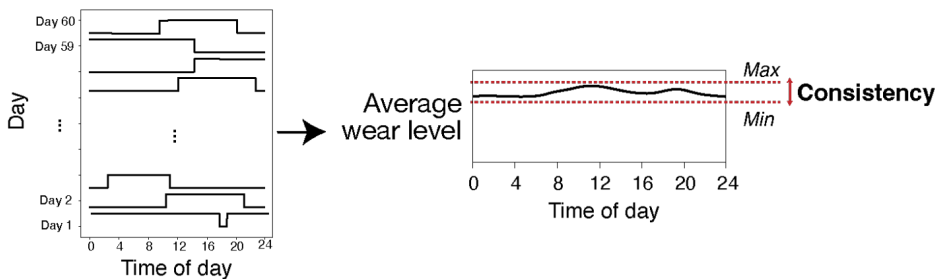

**B.**

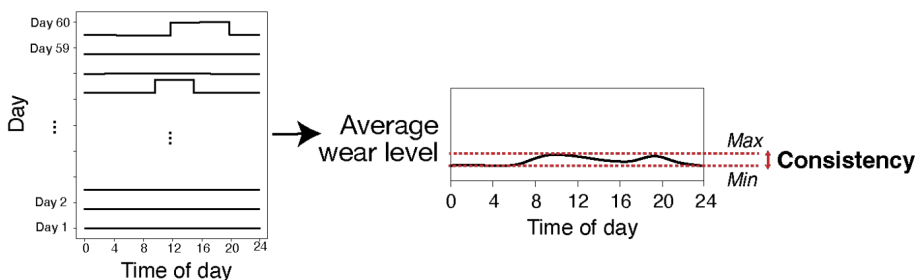

**C.**

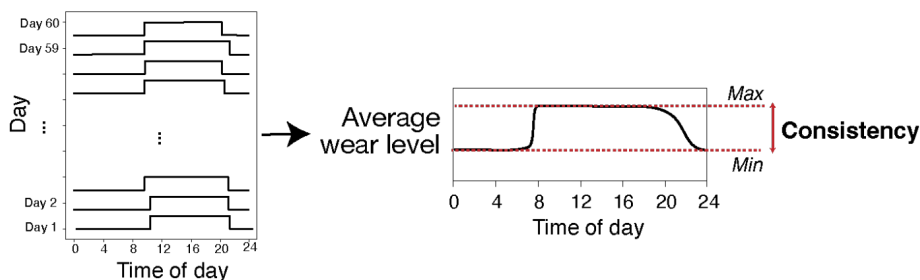

**D.**

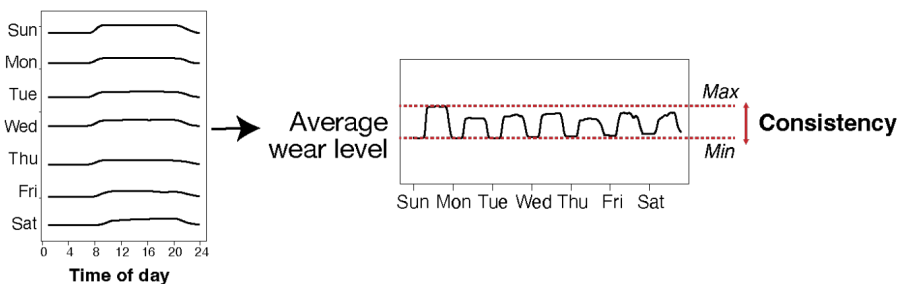

Supplement: Supplementary file 1 [file 9e34b2cde8a036057dd823b1.pdf]
